# Supplementary material
Source: PubMed Central journal article supplement (PMC4080841)
Supplement: NIHMS587623-supplement-01.pdf [file NIHMS587623-supplement-01.pdf]

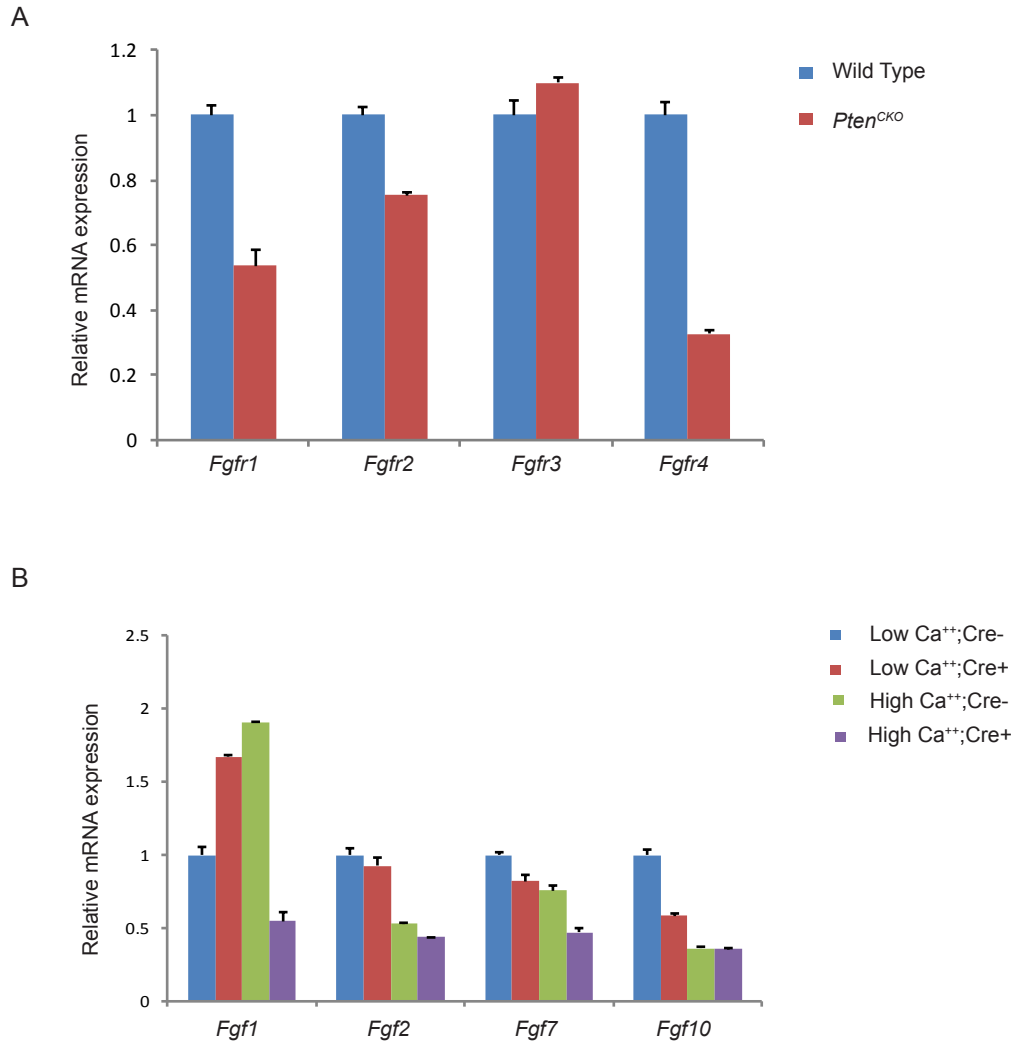

**Figure S1, Related to Figure 2. qPCR analysis of *Fgfr* and *Fgf* mRNA expression. (A)** Relative mRNA expression of *Fgfr1-4* did not increase in *Pten*<sup>CKO</sup> mouse skin. **(B)** Relative mRNA expression of various *Fgfs* in keratinocytes derived from *Pten*<sup>lox/lox</sup> mice, cultured in low or high Ca<sup>2+</sup> media and infected with adeno-cre virus. Data are presented as mean ± s.e.m.
